# Supplementary material
Source: publisher figshare collection journal article supplement (https://tandf.figshare.com/ndownloader/files/12285893)

Supplement 1 (Table) Reporting quality of included studies

| Study name | Study type | Analysis type | Adequate Sequence Generation | Allocation concealment | Blinding  (performance bias) | Drop-out/  completed rate | Other bias |
| --- | --- | --- | --- | --- | --- | --- | --- |
| Martinez-Pineiro, 2015 | RCT | ITT | Adequate | Adequate | Inadequate | Yes | No |
| Lamm,2000 | RCT | mITT* | Adequate | Adequate | Inadequate | Yes | disease free after introduction then randomlized |
| Palou, 2001 | RCT | mITT* | Inadequate | Inadequate | Inadequate | Yes | disease free after introduction then randomlized |
| Badalament, 1987 | RCT | ITT | Adequate | Adequate | Inadequate | Yes | Randomized after induction |
| Koga, 2010 | RCT | PP | Inadequate | Inadequate | Inadequate | Yes | disease free after introduction then randomlized |
| Hinotsu, 2011 | RCT | mITT | Adequate | Adequate | Inadequate | Yes | No |
| Akaza, 1995 | RCT | mITT* | Inadequate | Inadequate | Inadequate | Yes | disease free after introduction then randomlized |
| Oddens, 2013/  Brausi ,2014 | RCT | ITT | Inadequate | Inadequate | Inadequate | Yes | No |
| Yabusaki, 1991 | RCT | PP | Inadequate | Inadequate | Inadequate | Yes | MMC 20mg once on 5d after TUR |


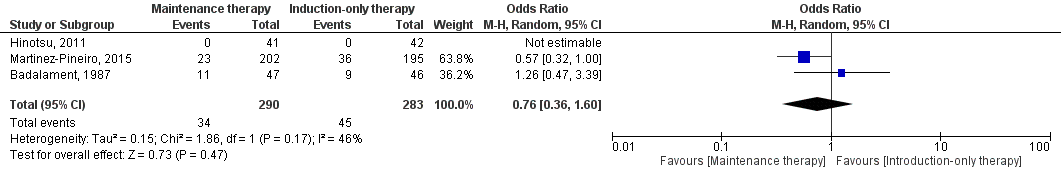


Supplement 2 (Figure) The conventional meta-analysis on the incidence of muscle invasion comparing different maintenance schedules and introduction-only schedule in the adjuvant BCG immunotherapy of NMIBC

(A)


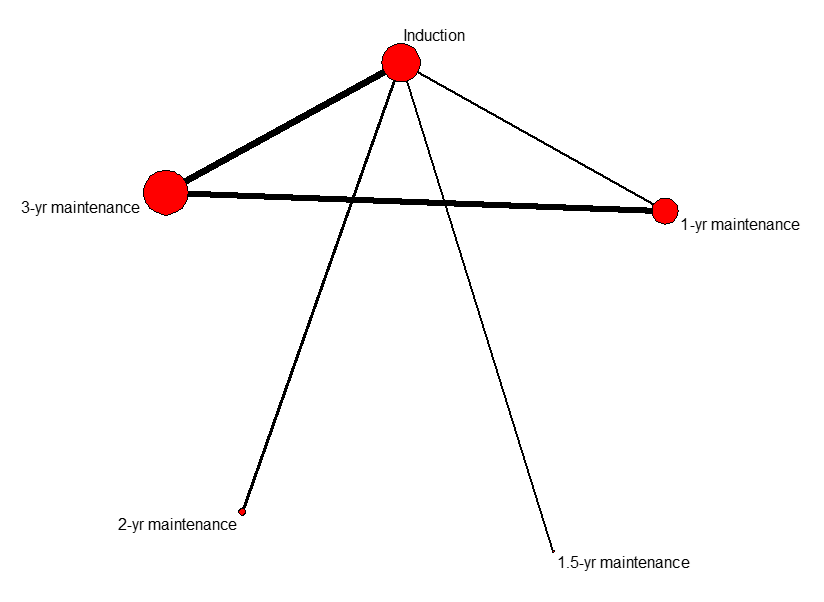


(B)

Supplement 3 (Figure) Evidence structures of eligible comparisons for network meta-analysis (A) recurrence (B) progression

Supplement 4 (Table) Results of network meta-analysis of side effects in different schedule in the adjuvant BCG immunotherapy of NMIBC


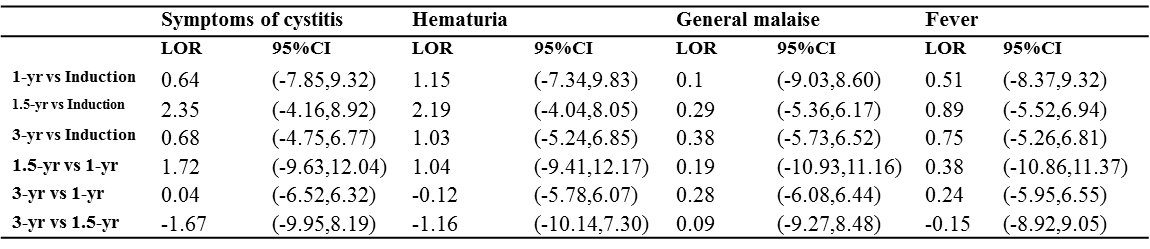

Supplement: Supplementary file 1 [file 12285893]
